# Supplementary material for: MS-222 and Propofol Sedation during and after the Simulated Transport of Nile tilapia (Oreochromis niloticus)
Source: MDPI journal article supplement (doi:10.3390/biology10121309), 2021-12-10
Supplement: s1 [file s1]

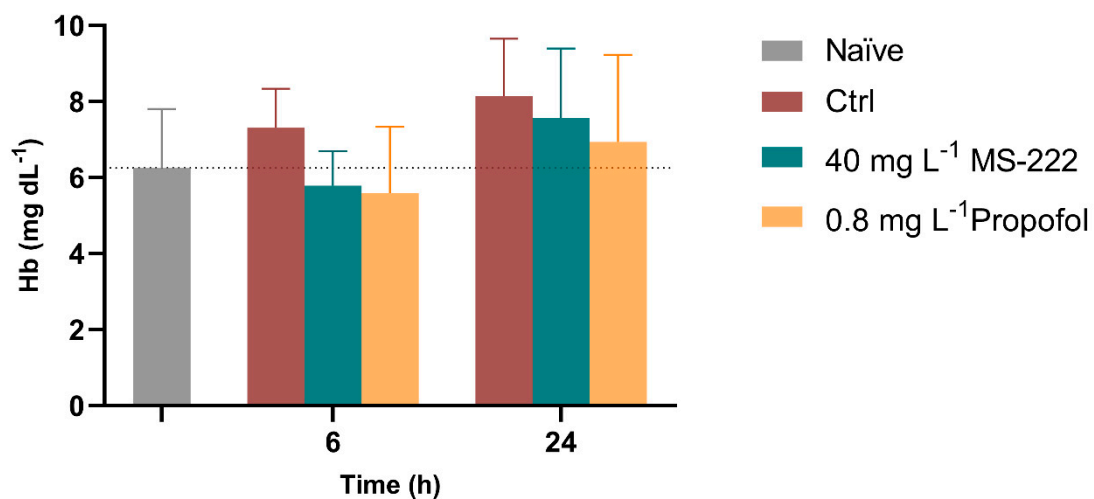

**Figure S1 – Haemoglobin (Hb) concentration in blood from Nile tilapia transported in the different experimental conditions for 6 h and after a 24 h recovery period.** Data are presented as mean±SD. No statistical differences were observed between experimental groups at any of the analysed time-points ( $p>0.05$ ).

**Table S1 – Frequency per min (#) and duration in sec (time) of behaviours analysed during 5 min at the recovery period, 24 h after the simulated transport.**

|          | S             |               | BS            |             | I             |             | EM            |             | IO                          | MS            | C               |
|----------|---------------|---------------|---------------|-------------|---------------|-------------|---------------|-------------|-----------------------------|---------------|-----------------|
|          | #             | s             | #             | time        | #             | time        | #             | time        | #                           | #             | #               |
| 6.5 h    |               |               |               |             |               |             |               |             |                             |               |                 |
| Ctrl     | 1.3 (1.2-3.7) | 190 (173-305) | 0.3 (0.2-0.7) | 19 (3-42)   | 0.7 (0.0-1.3) | 46 (0-181)  | 0.7 (0.2-1.5) | 25 (2-154)  | 0.0 (0.0-0.0) <sup>a</sup>  | 2.0 (0.0-6.8) | 6.5 (1.8-12.5)  |
| MS-222   | 2.7 (1.0-5.0) | 183 (98-311)  | 0.8 (0.3-1.7) | 26 (6-135)  | 0.8 (0.2-1.2) | 79 (14-262) | 0.3 (0.0-2.8) | 3 (0-105)   | 0.0 (0.0-0.2) <sup>ab</sup> | 1.2 (0.0-4.0) | 8.7 (3.2-16.8)  |
| Propofol | 2.5 (1.5-4.9) | 207 (165-305) | 1.8 (0.0-3.2) | 154 (0-244) | 0.8 (0.0-2.2) | 74 (0-184)  | 0.8 (0.5-2.2) | 21 (11-153) | 0.2 (0.0-2.7) <sup>b</sup>  | 1.0 (0.0-1.4) | 9.8 (1.2-21.5)  |
| 24 h     |               |               |               |             |               |             |               |             |                             |               |                 |
| Ctrl     | 2.5 (1.5-3.5) | 276 (197-333) | 0.0 (0.0-0.5) | 0 (0-100)   | 0.6 (0.0-2.3) | 16 (0-137)  | 1.5 (0.2-2.8) | 38 (6-122)  | 0.0 (0.0-1.3)               | 2.3 (0.3-2.7) | 9.7 (7.7-22.5)  |
| MS-222   | 2.2 (1.3-5.2) | 231 (105-306) | 0.0 (0.0-0.7) | 0 (0-30)    | 1.2 (0.2-1.5) | 59 (6-256)  | 1.5 (0.0-3.2) | 48 (0-185)  | 0.0 (0.0-0.3)               | 1.7 (0.3-5.8) | 10.5 (3.3-16.5) |
| Propofol | 3.1 (2.2-3.5) | 257 (235-315) | 0.2 (0.0-0.7) | 5 (0-19)    | 1.4 (0.8-1.8) | 72 (22-86)  | 1.7 (0.8-2.2) | 31 (14-76)  | 0.6 (0.0-2.5)               | 1.8 (1.3-2.5) | 11.4 (9.5-11.4) |

Swimming (S), Bottom swimming (BS), Inactive (I), Erratic movements (EM), Interaction with Objects (IO), Mirror Stimulation (MS) and Crossings (C) obtained from 7 independent replicates and expressed median and interquartile ranges. Statistical analyses were performed using the Kruskal–Wallis test followed by Dunn's multiple-comparison post-hoc tests analysis while the effect of time was tested by Friedmann. Different lowercase letters indicate significant differences between groups ( $p < 0.05$ ).

**Table S2 – Effects of the different treatments on the pH, redox potential (Eh), colour, drip loss and glucose-based glycogen content at the end of the transportation (6 h) and at the end of the recovery period (24 h).**

|          | pH                     | Eh (mV)      | L*         | a*         | b*        | Chroma    | Hue         | $\Delta E^1$ | Drip loss<br>(after 7 days) | Glucose-based<br>glycogen (mmol g <sup>-1</sup> wt) |
|----------|------------------------|--------------|------------|------------|-----------|-----------|-------------|--------------|-----------------------------|-----------------------------------------------------|
| 6 h      |                        |              |            |            |           |           |             |              |                             |                                                     |
| Naïve    | 6.92±0.19              | -50.83±32.02 | 49.27±2.63 | -0.86±0.97 | 5.78±1.48 | 5.95±1.32 | 178.03±4.06 | 0            | 3.57±1.07                   | 4.36±1.13                                           |
| Ctrl     | 7.01±0.20              | -58.86±21.17 | 48.55±3.30 | -1.07±1.09 | 5.93±2.38 | 6.13±2.32 | 180.68±6.49 | 1.80±1.21    | 3.94±0.44                   | 4.12±1.39                                           |
| MS-222   | 7.14±0.10 <sup>A</sup> | -57.71±39.98 | 49.31±1.66 | -1.09±1.03 | 5.36±2.06 | 5.64±1.84 | 171.67±12.3 | 2.31±1.11    | 4.32±0.79                   | 4.42±1.97                                           |
| Propofol | 7.10±0.08 <sup>A</sup> | -69.57±24.67 | 49.41±1.27 | -2.01±1.41 | 5.25±1.93 | 5.69±2.23 | 180.65±1.07 | 2.23±1.60    | 3.25±1.45                   | 3.94±0.36                                           |
| 24 h     |                        |              |            |            |           |           |             |              |                             |                                                     |
| Naïve    | 6.91±0.09              | -61.50±27.33 | 50.11±1.06 | -1.19±0.24 | 4.49±1.12 | 4.67±1.04 | 178.96±2.73 | 0            | 3.71±0.56                   | 5.24±1.02                                           |
| Ctrl     | 6.82±0.11              | -38.50±36.62 | 48.89±1.73 | -1.35±0.42 | 4.83±1.24 | 5.04±1.19 | 180.66±1.34 | 2.16±1.08    | 4.22±0.76                   | 4.37±0.50                                           |
| MS-222   | 6.75±0.08 <sup>B</sup> | -41.17±27.29 | 47.94±2.02 | -0.69±0.43 | 5.19±1.35 | 5.26±1.33 | 179.23±2.56 | 2.52±1.52    | 3.92±0.46                   | 4.42±0.63                                           |
| Propofol | 6.81±0.12 <sup>B</sup> | -42.17±27.75 | 48.90±1.65 | -1.04±0.46 | 5.32±1.43 | 5.46±1.34 | 181.65±4.45 | 1.645±0.42   | 3.86±1.18                   | 5.37±1.76                                           |

L\* - lightness; a\* - redness; b\* - yellowness. <sup>1</sup> Total colour difference was normalized to the Naïve group. Data obtained from 7 independent replicates and expressed as mean±SD. Statistical analysis was performed using two-way ANOVA followed by Tukey's multiple-comparison test. Different capital letters represent statistical differences between time within the same group (p<0.05).

**Table S3 – Biochemical parameters evaluated in different organs at the end of the simulated transportation (6 h) and after the recovery period (24 h).**

|        |          | ROS<br>(nmol DCF<br>mg protein <sup>-1</sup> ) | SOD<br>(KU mg protein <sup>-1</sup> ) | CAT<br>(U mg protein <sup>-1</sup> ) | GPx<br>(μmol NADPH min <sup>-1</sup> mg<br>protein <sup>-1</sup> ) | GR<br>(μmol NADPH min <sup>-1</sup> mg<br>protein <sup>-1</sup> ) | GST<br>(μmol CDNB min <sup>-1</sup> mg<br>protein <sup>-1</sup> ) | GSH<br>(μmol mg protein <sup>-1</sup> ) | GSSG<br>(μmol mg protein <sup>-1</sup> ) | OSI                    | LPO<br>(μmol MDA<br>mg protein <sup>-1</sup> ) |
|--------|----------|------------------------------------------------|---------------------------------------|--------------------------------------|--------------------------------------------------------------------|-------------------------------------------------------------------|-------------------------------------------------------------------|-----------------------------------------|------------------------------------------|------------------------|------------------------------------------------|
| Gills  | 6 h      |                                                |                                       |                                      |                                                                    |                                                                   |                                                                   |                                         |                                          |                        |                                                |
|        | Naïve    | 0.84 (0.38-1.13) <sup>ab</sup>                 | 0.98±0.54                             | 0.08 (0.05-0.19)                     | 0.10 (0.06-0.13)                                                   | 0.05 (0.06-0.09)                                                  | 0.10 (0.07-0.17) <sup>ab</sup>                                    | 0.03 (0.02-0.04)                        | 0.07±0.06                                | 0.25 (0.17-0.27)       | 10.3 (2.6-14.2)                                |
|        | Ctrl     | 1.05 (0.80-1.47) <sup>a</sup>                  | 1.36±0.50                             | 0.19 (0.09-0.27)                     | 0.09 (0.04-0.11)                                                   | 0.15 (0.07-0.32) <sup>a</sup>                                     | 0.20 (0.17-0.32) <sup>a</sup>                                     | 0.03 (0.01-0.04)                        | 0.24±0.15                                | 0.11 (0.05-0.24)       | 12.5 (7.9-19.2)                                |
|        | MS-222   | 0.72 (0.51-0.97) <sup>ab</sup>                 | 0.88±0.31                             | 0.26 (0.18-0.38)                     | 0.05 (0.04-0.11)                                                   | 0.07 (0.04-0.10)                                                  | 0.14 (0.10-0.19) <sup>ab</sup>                                    | 0.06 (0.04-0.08)                        | 0.35±0.18                                | 0.14 (0.10-0.19)       | 16.3 (8.5-22.8)                                |
|        | Propofol | 0.53 (0.32-0.63) <sup>b</sup>                  | 0.99±0.41                             | 0.11 (0.07-0.21) <sup>A</sup>        | 0.07 (0.03-0.11)                                                   | 0.05 (0.04-0.08)                                                  | 0.11 (0.09-0.15) <sup>b</sup>                                     | 0.06 (0.04-0.08)                        | 0.23±0.22                                | 0.11 (0.09-0.25)       | 11.0 (6.0-18.3)                                |
|        | 24 h     |                                                |                                       |                                      |                                                                    |                                                                   |                                                                   |                                         |                                          |                        |                                                |
|        | Naïve    | 0.72 (0.24-1.09)                               | 0.93±0.38                             | 0.37 (0.24-0.42)                     | 0.05 (0.04-0.13)                                                   | 0.09 (0.06-0.12)                                                  | 0.12 (0.09-0.14)                                                  | 0.04 (0.03-0.07)                        | 0.22±0.08                                | 0.17 (0.10-0.69)       | 16.1 (11.8-18.6)                               |
|        | Ctrl     | 0.89 (0.54-1.02)                               | 1.08±0.34                             | 0.17 (0.09-0.43)                     | 0.07 (0.05-0.14)                                                   | 0.08 (0.04-0.12)                                                  | 0.10 (0.08-0.18)                                                  | 0.02 (0.01-0.03)                        | 0.26±0.23                                | 0.10 (0.07-0.88)       | 11.8 (5.4-18.1)                                |
|        | MS-222   | 0.65 (0.50-0.84)                               | 0.92±0.46                             | 0.19 (0.16-0.50)                     | 0.06 (0.03-0.10)                                                   | 0.07 (0.03-0.11)                                                  | 0.10 (0.07-0.17)                                                  | 0.02 (0.02-0.03)                        | 0.26±0.16                                | 0.23 (0.13-0.25)       | 11.6 (7.5-15.9)                                |
|        | Propofol | 0.60 (0.39-1.17)                               | 0.93±0.38                             | 0.29 (0.24-0.39) <sup>B</sup>        | 0.05 (0.04-0.12)                                                   | 0.07 (0.04-0.09)                                                  | 0.10 (0.08-0.13)                                                  | 0.04 (0.02-0.09)                        | 0.15±0.10                                | 0.44 (0.17-0.59)       | 15.8 (7.3-20.9)                                |
| Muscle | 6 h      |                                                |                                       |                                      |                                                                    |                                                                   |                                                                   |                                         |                                          |                        |                                                |
|        | Naïve    | 0.43±0.17                                      | 0.39±0.13                             | 0.37 (0.07-0.59)                     | 0.01 (0.01-0.02)                                                   | 0.03±0.01                                                         | 0.03 (0.01-0.03)                                                  | 0.56±0.28                               | 0.59±0.23                                | 1.16±0.40              | 15.3±4.90                                      |
|        | Ctrl     | 0.47±0.25                                      | 0.27±0.08                             | 0.43 (0.30-0.79)                     | 0.01 (0.01-0.01)                                                   | 0.02±0.01                                                         | 0.02 (0.01-0.03)                                                  | 0.75±0.28 <sup>A</sup>                  | 0.67±0.32                                | 1.23±0.56 <sup>A</sup> | 20.1±9.60                                      |
|        | MS-222   | 0.44±0.25                                      | 0.38±0.05                             | 0.33 (0.23-0.43)                     | 0.02 (0.02-0.03)                                                   | 0.03±0.01                                                         | 0.02 (0.01-0.04)                                                  | 0.51±0.26                               | 0.74±0.49                                | 0.65±0.19              | 16.6±11.5                                      |
|        | Propofol | 0.33±0.16                                      | 0.39±0.14                             | 0.25 (0.10-0.64)                     | 0.02 (0.01-0.03)                                                   | 0.02±0.02                                                         | 0.02 (0.02-0.04)                                                  | 0.43±0.31                               | 0.77±0.70                                | 0.66±0.36              | 15.7±11.3                                      |
|        | 24 h     |                                                |                                       |                                      |                                                                    |                                                                   |                                                                   |                                         |                                          |                        |                                                |
|        | Naïve    | 0.37±0.15                                      | 0.33±0.13                             | 0.37 (0.27-0.52)                     | 0.02 (0.02-0.04)                                                   | 0.03±0.02                                                         | 0.02 (0.02-0.03)                                                  | 0.39±0.23                               | 0.59±0.25                                | 0.80±0.25              | 23.2±18.0                                      |
|        | Ctrl     | 0.36±0.12                                      | 0.34±0.11                             | 0.23 (0.13-0.54)                     | 0.02 (0.01-0.03)                                                   | 0.03±0.02                                                         | 0.02 (0.01-0.03)                                                  | 0.34±0.23 <sup>B</sup>                  | 0.84±0.35                                | 0.46±0.26 <sup>B</sup> | 18.1±8.70                                      |
|        | MS-222   | 0.37±0.14                                      | 0.32±0.10                             | 0.16 (0.15-0.63)                     | 0.02 (0.01-0.03)                                                   | 0.03±0.01                                                         | 0.02 (0.02-0.03)                                                  | 0.38±0.15                               | 0.55±0.26                                | 0.89±0.47              | 20.4±17.0                                      |
|        | Propofol | 0.34±0.10                                      | 0.28±0.06                             | 0.40 (0.30-0.53)                     | 0.02 (0.02-0.02)                                                   | 0.02±0.02                                                         | 0.01 (0.00-0.02)                                                  | 0.40±0.25                               | 0.74±0.47                                | 0.70±0.35              | 22.9±13.1                                      |
| Brain  | 6 h      |                                                |                                       |                                      |                                                                    |                                                                   |                                                                   |                                         |                                          |                        |                                                |
|        | Naïve    | 0.89±0.52                                      | 1.18±0.76                             | 0.07 (0.04-0.22)                     | 0.06±0.02                                                          | 0.07±0.04 <sup>A</sup>                                            | 0.72±0.26                                                         | 0.07±0.03                               | 0.22±0.14 <sup>ab</sup>                  | 0.23±0.11              | 2.49±2.49                                      |
|        | Ctrl     | 0.49±0.23                                      | 1.00±0.62                             | 0.11 (0.08-0.22)                     | 0.05±0.02                                                          | 0.10±0.07                                                         | 0.38±0.27                                                         | 0.07±0.08                               | 0.44±0.17 <sup>a</sup>                   | 0.34±0.22              | 4.83±3.11                                      |
|        | MS-222   | 0.80±0.22                                      | 1.45±0.41                             | 0.24 (0.03-0.26)                     | 0.07±0.02                                                          | 0.09±0.04                                                         | 0.65±0.20                                                         | 0.07±0.04                               | 0.27±0.17 <sup>ab</sup>                  | 0.14±0.07              | 3.70±3.09                                      |
|        | Propofol | 0.77±0.51                                      | 1.23±0.74                             | 0.20 (0.09-0.22)                     | 0.05±0.02                                                          | 0.08±0.03                                                         | 0.46±0.31                                                         | 0.07±0.04                               | 0.13±0.07 <sup>b,A</sup>                 | 0.22±0.17              | 3.66±3.52                                      |
|        | 24 h     |                                                |                                       |                                      |                                                                    |                                                                   |                                                                   |                                         |                                          |                        |                                                |
|        | Naïve    | 0.70±0.36                                      | 1.33±0.76                             | 0.04 (0.03-0.14)                     | 0.06±0.04                                                          | 0.15±0.04 <sup>B</sup>                                            | 0.54±0.22                                                         | 0.06±0.06                               | 0.14±0.11                                | 0.45±0.29              | 4.14±2.32                                      |
|        | Ctrl     | 0.59±0.31                                      | 1.19±0.76                             | 0.12 (0.06-0.27)                     | 0.08±0.05                                                          | 0.10±0.08                                                         | 0.52±0.27                                                         | 0.07±0.05                               | 0.30±0.20                                | 0.22±0.14              | 5.02±3.93                                      |
|        | MS-222   | 0.67±0.18                                      | 1.55±0.80                             | 0.21 (0.08-0.32)                     | 0.04±0.04                                                          | 0.10±0.04                                                         | 0.63±0.18                                                         | 0.06±0.05                               | 0.29±0.24                                | 0.19±0.10              | 4.82±2.68                                      |
|        | Propofol | 0.80±0.41                                      | 0.64±0.34                             | 0.19 (0.14-0.34)                     | 0.06±0.04                                                          | 0.09±0.05                                                         | 0.53±0.26                                                         | 0.13±0.09                               | 0.38±0.11 <sup>B</sup>                   | 0.24±0.20              | 4.55±3.05                                      |
| Liver  | 6 h      |                                                |                                       |                                      |                                                                    |                                                                   |                                                                   |                                         |                                          |                        |                                                |
|        | Naïve    | 1.52 (1.22-1.70)                               | 0.53 (0.37-0.62)                      | 2.01 (1.41-2.52) <sup>A</sup>        | 0.04±0.01                                                          | 0.02 (0.02-0.03) <sup>a,A</sup>                                   | 0.27±0.11                                                         | 0.31 (0.16-0.41)                        | 4.71±0.23                                | 0.07±0.03              | 50.1 (33.0-68.9)                               |
|        | Ctrl     | 1.20 (0.49-1.32)                               | 0.80 (0.58-0.85)                      | 0.86 (0.59-1.36)                     | 0.05±0.02                                                          | 0.05 (0.03-0.08) <sup>b,A</sup>                                   | 0.25±0.15                                                         | 0.22 (0.20-0.37)                        | 4.33±3.16                                | 0.09±0.05              | 51.1 (20.2-59.3)                               |
|        | MS-222   | 1.10 (0.77-1.37)                               | 0.67 (0.59-0.68)                      | 1.01 (0.66-1.44)                     | 0.05±0.02                                                          | 0.03 (0.02-0.05) <sup>ab</sup>                                    | 0.27±0.14                                                         | 0.22 (0.12-0.37)                        | 4.32±2.53                                | 0.07±0.04              | 22.8 (17.9-42.4)                               |
|        | Propofol | 0.98 (0.67-1.32)                               | 0.58 (0.48-0.69)                      | 1.31 (1.11-1.56)                     | 0.05±0.01                                                          | 0.04 (0.02-0.08) <sup>ab</sup>                                    | 0.30±0.15                                                         | 0.28 (0.18-0.50)                        | 4.46±3.03                                | 0.09±0.03              | 33.6 (28.6-35.8)                               |
|        | 24 h     |                                                |                                       |                                      |                                                                    |                                                                   |                                                                   |                                         |                                          |                        |                                                |
|        | Naïve    | 0.99 (0.54-1.49)                               | 0.49 (0.41-0.63)                      | 1.04 (0.65-1.49) <sup>B</sup>        | 0.04±0.01                                                          | 0.08 (0.04-0.09) <sup>a,B</sup>                                   | 0.31±0.24                                                         | 0.22 (0.11-0.46)                        | 4.40±2.93                                | 0.07±0.04              | 65.7 (36.1-74.8)                               |
|        | Ctrl     | 1.07 (0.95-1.78)                               | 0.47 (0.38-0.70)                      | 1.23 (0.49-1.39)                     | 0.04±0.02                                                          | 0.02 (0.01-0.03) <sup>ab,B</sup>                                  | 0.34±0.10                                                         | 0.31 (0.15-0.41)                        | 3.68±0.98                                | 0.09±0.04              | 33.4 (24.9-50.0)                               |
|        | MS-222   | 1.06 (0.81-1.30)                               | 0.51 (0.45-0.70)                      | 1.09 (0.71-1.20)                     | 0.04±0.02                                                          | 0.02 (0.02-0.05) <sup>ab</sup>                                    | 0.28±0.14                                                         | 0.25 (0.13-0.43)                        | 4.67±2.77                                | 0.08±0.06              | 51.1 (24.7-56.9)                               |
|        | Propofol | 0.93 (0.73-1.27)                               | 0.47 (0.36-0.58)                      | 0.85 (0.38-1.70)                     | 0.04±0.01                                                          | 0.01 (0.01-0.02) <sup>b</sup>                                     | 0.31±0.11                                                         | 0.24 (0.11-0.38)                        | 4.48±3.16                                | 0.07±0.03              | 48.8 (31.1-67.9)                               |

Data from 7 independent replicates expressed as mean ± SD for parametric data distribution or median and interquartile range for non-parametric data. Statistical analysis was performed using one-way ANOVA followed by Tukey's multiple-comparison test or Kruskal-Wallis followed by Dunn's multiple-comparison post-hoc tests. Different lowercase letters indicate significant differences between groups while capital letters represent statistical differences between time within the same group (p<0.05).
